# Supplementary material
Source: Springer Nature journal article supplement (https://www.springermedizin.de/resource/supplementary/12986_2011_315_MOESM4_ESM.pdf/25655814)

**A**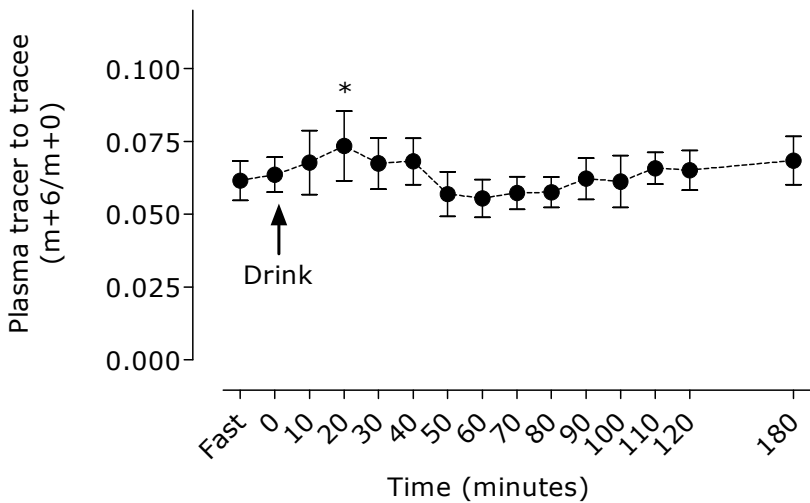**B**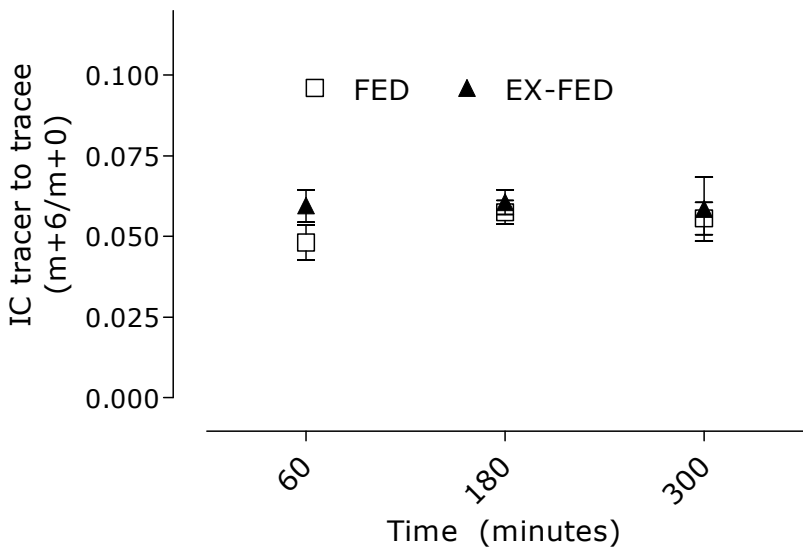

Supplement: MOESM4 [file 25655814]
